# Supplementary material
Source: PubMed Central journal article supplement (PMC6475118)

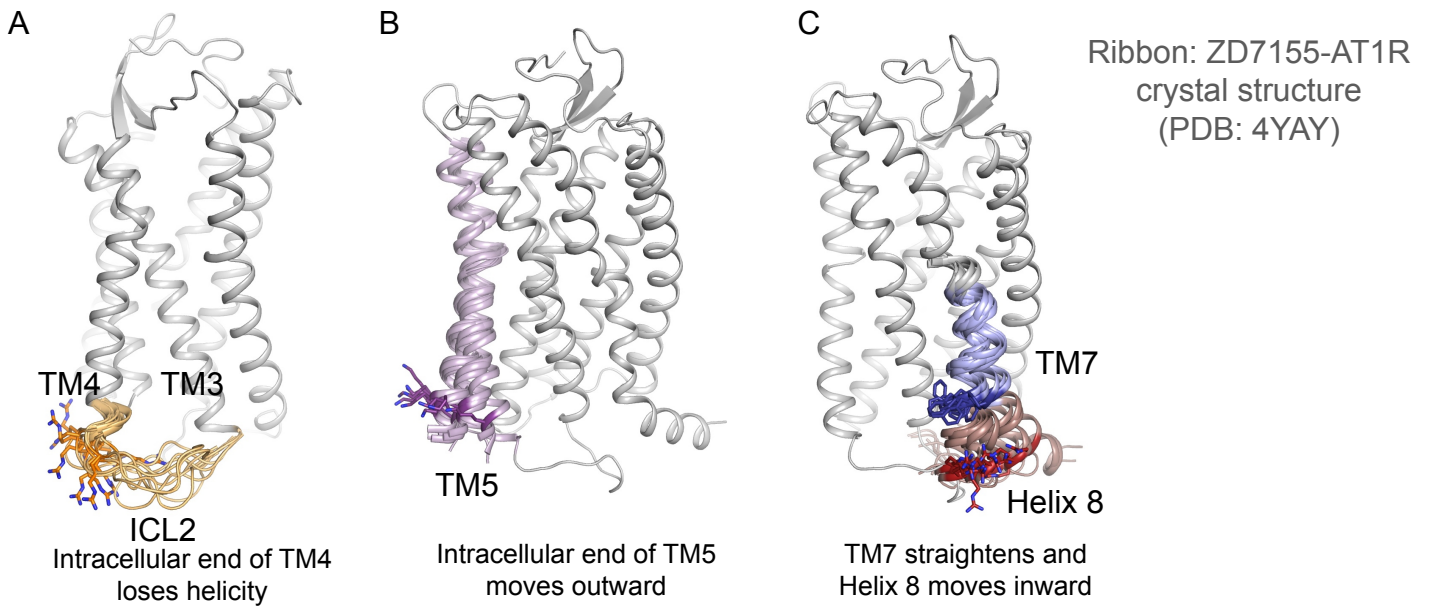

**D** High probability V1 rotamers attached to crystal structure exhibit minimal overlap with DEER clouds at several sites

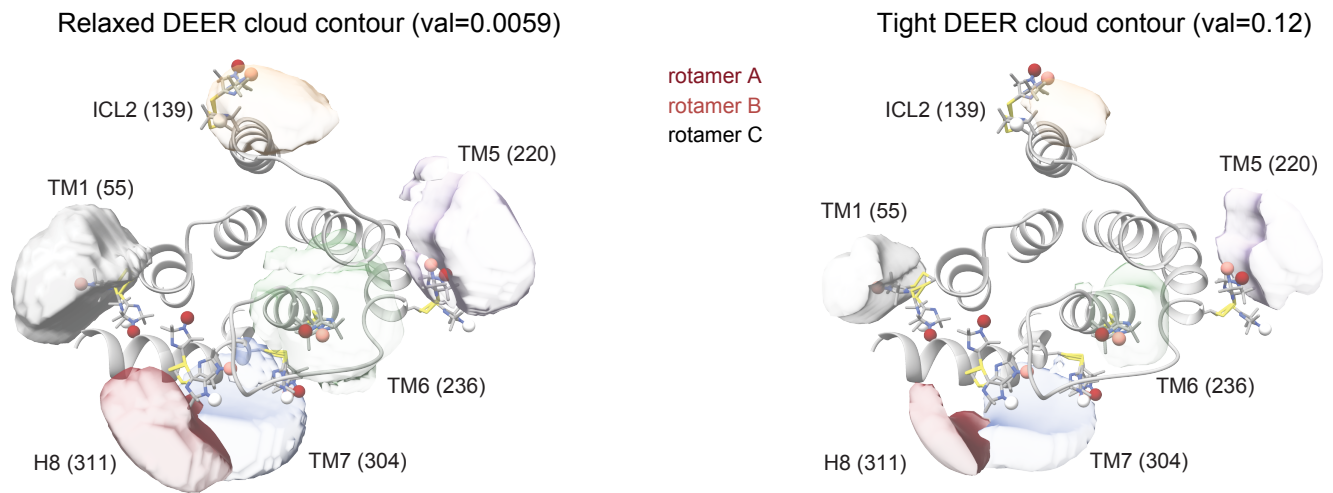

**E** Fraction of MD simulation frames containing a high probability V1 rotamer in DEER cloud

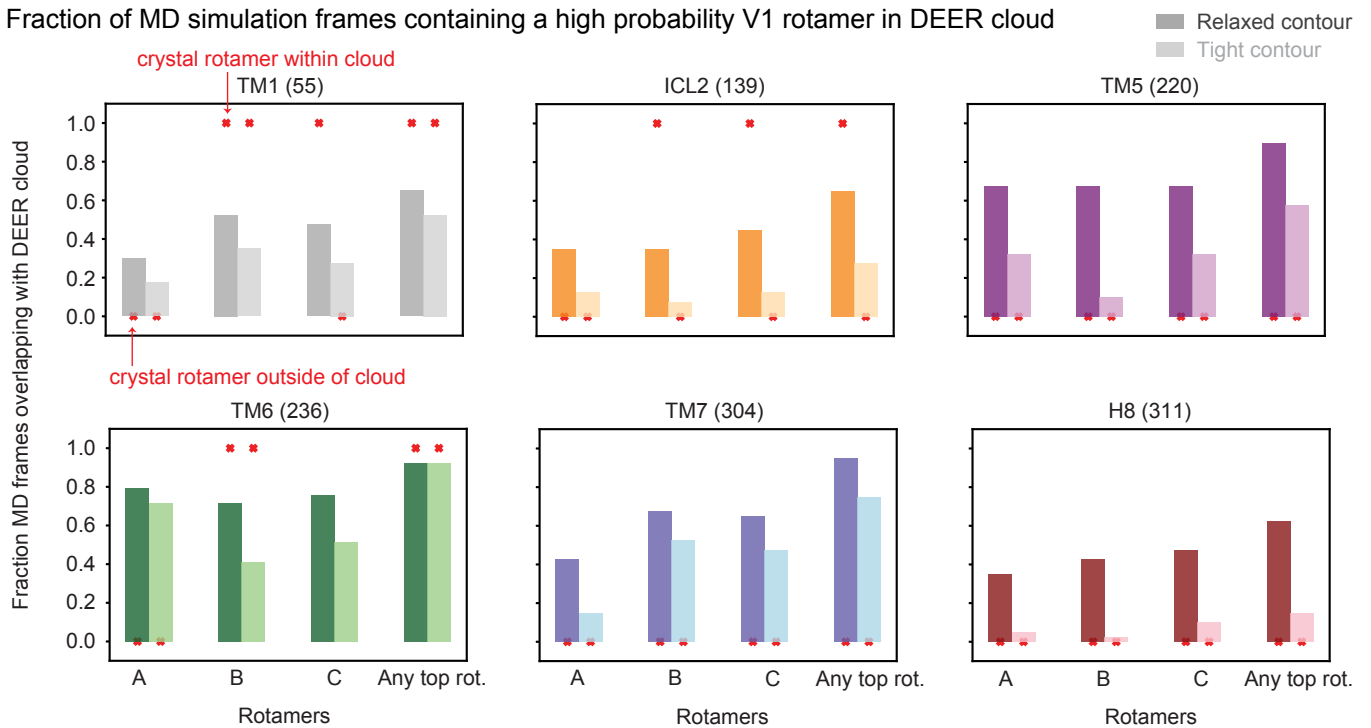

Supplement: NIHMS1516271-supplement-5.pdf [file NIHMS1516271-supplement-5.pdf]
