# Supplementary material
Source: PubMed Central journal article supplement (PMC6475118)
Supplement: NIHMS1516271-supplement-Tables.pdf [file NIHMS1516271-supplement-Tables.pdf]

Table S1: AT1R ligand panel. Related to Figures 3, 4, S1, and S5.

| Ligand      | Log Ki                 |                        | Cellular signaling bias<br>(Rajagopal et al., 2011) |                      |                                                                             | Molecular efficacy bias<br>(Strachan et al., 2014) |                           |                                                                   | NNMF component amplitude<br>(% population) |      |      |      |
|-------------|------------------------|------------------------|-----------------------------------------------------|----------------------|-----------------------------------------------------------------------------|----------------------------------------------------|---------------------------|-------------------------------------------------------------------|--------------------------------------------|------|------|------|
|             | Wild-type              | Minimal cysteine       | $\sigma_{IP1}$                                      | $\sigma_{\beta arr}$ | Bias factor ( $\beta$ )<br>$((\sigma_{IP1} - \sigma_{\beta arr})/\sqrt{2})$ | Log $\alpha_{Gq}$                                  | Log $\alpha_{\beta arr2}$ | Molecular bias<br>$(\text{Log}(\alpha_{Gq}/\alpha_{\beta arr2}))$ | I                                          | II   | III  | IV   |
| Candesartan | ND                     | -7.93 ± 0.05           | ND                                                  | ND                   | ND                                                                          | ND                                                 | ND                        | ND                                                                | 95.7                                       | 1.6  | 2.6  | 0    |
| Olmesartan  | See below <sup>a</sup> | See below <sup>a</sup> | ND                                                  | ND                   | ND                                                                          | ND                                                 | ND                        | ND                                                                | 89.2                                       | 4.3  | 0    | 6.6  |
| Apo         | N/A                    | N/A                    | N/A                                                 | N/A                  | N/A                                                                         | N/A                                                | N/A                       | N/A                                                               | 65.4                                       | 27.6 | 0    | 6.9  |
| TRV026      | -7.42 ± 0.02           | -6.90 ± 0.04           | -1.983 ± 0.188                                      | -0.290 ± 0.107       | -1.197 ± 0.217                                                              | 0.20 ± 0.02                                        | 1.26 ± 0.02               | -1.061 ± 0.080                                                    | 21.8                                       | 78.3 | 0    | 0    |
| TRV027      | -6.58 ± 0.04           | -6.06 ± 0.01           | ND                                                  | ND                   | ND                                                                          | ND                                                 | ND                        | ND                                                                | 17.1                                       | 42.8 | 31.7 | 8.4  |
| TRV023      | -6.66 ± 0.04           | -6.33 ± 0.02           | ND                                                  | ND                   | ND                                                                          | 0.28 ± 0.04                                        | 1.14 ± 0.04               | -0.864 ± 0.090                                                    | 27.4                                       | 16.2 | 44.5 | 11.9 |
| TRV034      | -6.57 ± 0.04           | -6.14 ± 0.02           | -1.892 ± 0.166                                      | -0.105 ± 0.112       | -1.264 ± 0.201                                                              | 0.35 ± 0.08                                        | 1.11 ± 0.08               | -0.761 ± 0.090                                                    | 22.1                                       | 18.2 | 51.3 | 8.4  |
| AngII       | -7.76 ± 0.07           | -7.11 ± 0.01           | 0.000 ± 0.126                                       | 0.000 ± 0.121        | 0.000 ± 0.174                                                               | 1.63 ± 0.02                                        | 1.47 ± 0.02               | 0.162 ± 0.040                                                     | 17.5                                       | 7.5  | 48.5 | 26.6 |
| TRV055      | -5.26 ± 0.07           | -4.92 ± 0.01           | 1.582 ± 0.111                                       | 1.010 ± 0.120        | 0.404 ± 0.163                                                               | 2.62 ± 0.02                                        | 1.51 ± 0.02               | 1.106 ± 0.030                                                     | 44.3                                       | 12.2 | 1.1  | 42.3 |
| TRV056      | -4.67 ± 0.15           | -3.95 ± 0.05           | 1.119 ± 0.111                                       | 0.510 ± 0.119        | 0.431 ± 0.163                                                               | 2.59 ± 0.02                                        | 1.35 ± 0.02               | 1.245 ± 0.100                                                     | 48.0                                       | 15.0 | 0    | 37.0 |

Inhibitory constants (Ki), transducer coupling efficacies, and NNMF component amplitudes for AT1R ligands used in this study. Log Ki values (logarithm of the equilibrium dissociation constant in molar, shown graphically in Figure S1C) were determined for purified AT1R wild-type or minimal cysteine using the Kd values of [<sup>3</sup>H]-olmesartan shown below. Values of  $\sigma$  are those previously reported (Rajagopal et al., 2011) and represent the log ( $\tau_{ligand}/\tau_{AngII}$ ), where  $\tau$  is the transducer coupling efficiency for Gq-mediated IP1 generation and  $\beta$ -arrestin ( $\beta arr$ ) recruitment derived from the operational model. Cellular signaling data for TRV027 and TRV023 are reported elsewhere (Strachan et al., 2014; Violin et al., 2010). Log  $\alpha_{Gq}$  and log  $\alpha_{\beta arr}$  values are those previously reported (Strachan et al., 2014) and are molecular efficacy values describing the allosteric coupling between ligands and transducers in AT1R-Gq and AT1R- $\beta arr2$  fusion proteins. NNMF component amplitudes are the values shown graphically in Figure 4B. Error in all values reported represents standard error determined from at least three independent experiments. ND = not determined.

<sup>a</sup>AT1R wild-type [<sup>3</sup>H]-olmesartan Kd = 4.43 ± 0.36 nM, log Kd = -8.35; AT1R minimal cysteine [<sup>3</sup>H]-olmesartan Kd = 6.65 ± 0.65 nM, log Kd = -8.18

Table S2: Ligand-binding properties of spin-labeled AT1R mutants. Related to Figure 1 and Figure S1.

| <b>Construct</b>          | <b>Log IC<sub>50</sub> (M)</b> |
|---------------------------|--------------------------------|
| Minimal Cysteine          | -6.24 ± 0.15                   |
| TM1-ICL2<br>(55V1 139V1)  | -6.73 ± 0.13                   |
| TM1-TM6<br>(55V1 236V1)   | -6.55 ± 0.05                   |
| TM1-TM7<br>(55V1 304V1)   | -6.54 ± 0.11                   |
| TM1-H8<br>(55V1 311V1)    | -6.69 ± 0.06                   |
| TM5-H8<br>(220V1 311V1)   | -6.19 ± 0.16                   |
| ICL2-TM5<br>(139V1 220V1) | -5.94 ± 0.19                   |
| ICL2-TM6<br>(139V1 236V1) | -6.69 ± 0.06                   |
| ICL2-TM7<br>(139V1 304V1) | -6.43 ± 0.26                   |
| ICL2-H8<br>(139V1 311V1)  | -6.48 ± 0.18                   |
| TM6-H8<br>(236V1 311V1)   | -6.45 ± 0.23                   |

Log IC<sub>50</sub> values for AngII binding to spin-labeled AT1R constructs determined by [<sup>3</sup>H]-olmesartan competition radioligand binding in the scintillation proximity assay. Data are the mean and standard error of the log IC<sub>50</sub> values determined in at least three independent experiments.

Table S3: Oligonucleotides used in this study. Related to Key Resources Table.

| Oligonucleotide | Sequence                                                       |
|-----------------|----------------------------------------------------------------|
| C76A_fwd        | gaatttagcactggctgacttaGCcttttactgactttgccacta                  |
| C121A_fwd       | ctagtgtgttctactcacgGCctcagcattgatcgatacc                       |
| C149A_fwd       | gctttagcctaaagtcaccGCcatcatcattggctgctg                        |
| C289A_fwd       | cacggccatgcctatcaccattGCtatagcttatttaacaattgcc                 |
| C296A_fwd       | cctatcaccattgctatagcttatttaacaatGCcctgaatcctctttttatg          |
| C355A_fwd       | accaagaagcctgcaccaGCtttgagggtgagtgagg                          |
| F55C_fwd        | ttggtggtgatagtcatttactGttatatgaagctgaagactgtg                  |
| R139C_fwd       | cccaatgaagtcctcctTgCcgcaaatgctttag                             |
| K220C_fwd       | attcttacaagtatactcttatttggTGCgccctaaagaaggcttatgaaattcag       |
| D236C_fwd       | aaggcttatgaaattcagaagaacaaaccaagaaatTGtgatattttaagataattatggca |
| F304C_fwd       | tgccctgaatcctctttttatggctGtctggggaaaaaat                       |
| R311C_fwd       | ctctttttatggcttctggggaaaaaatTaaTgCtattttctccagctctaaaatatattc  |
