# Supplementary material
Source: PubMed Central journal article supplement (PMC6475118)

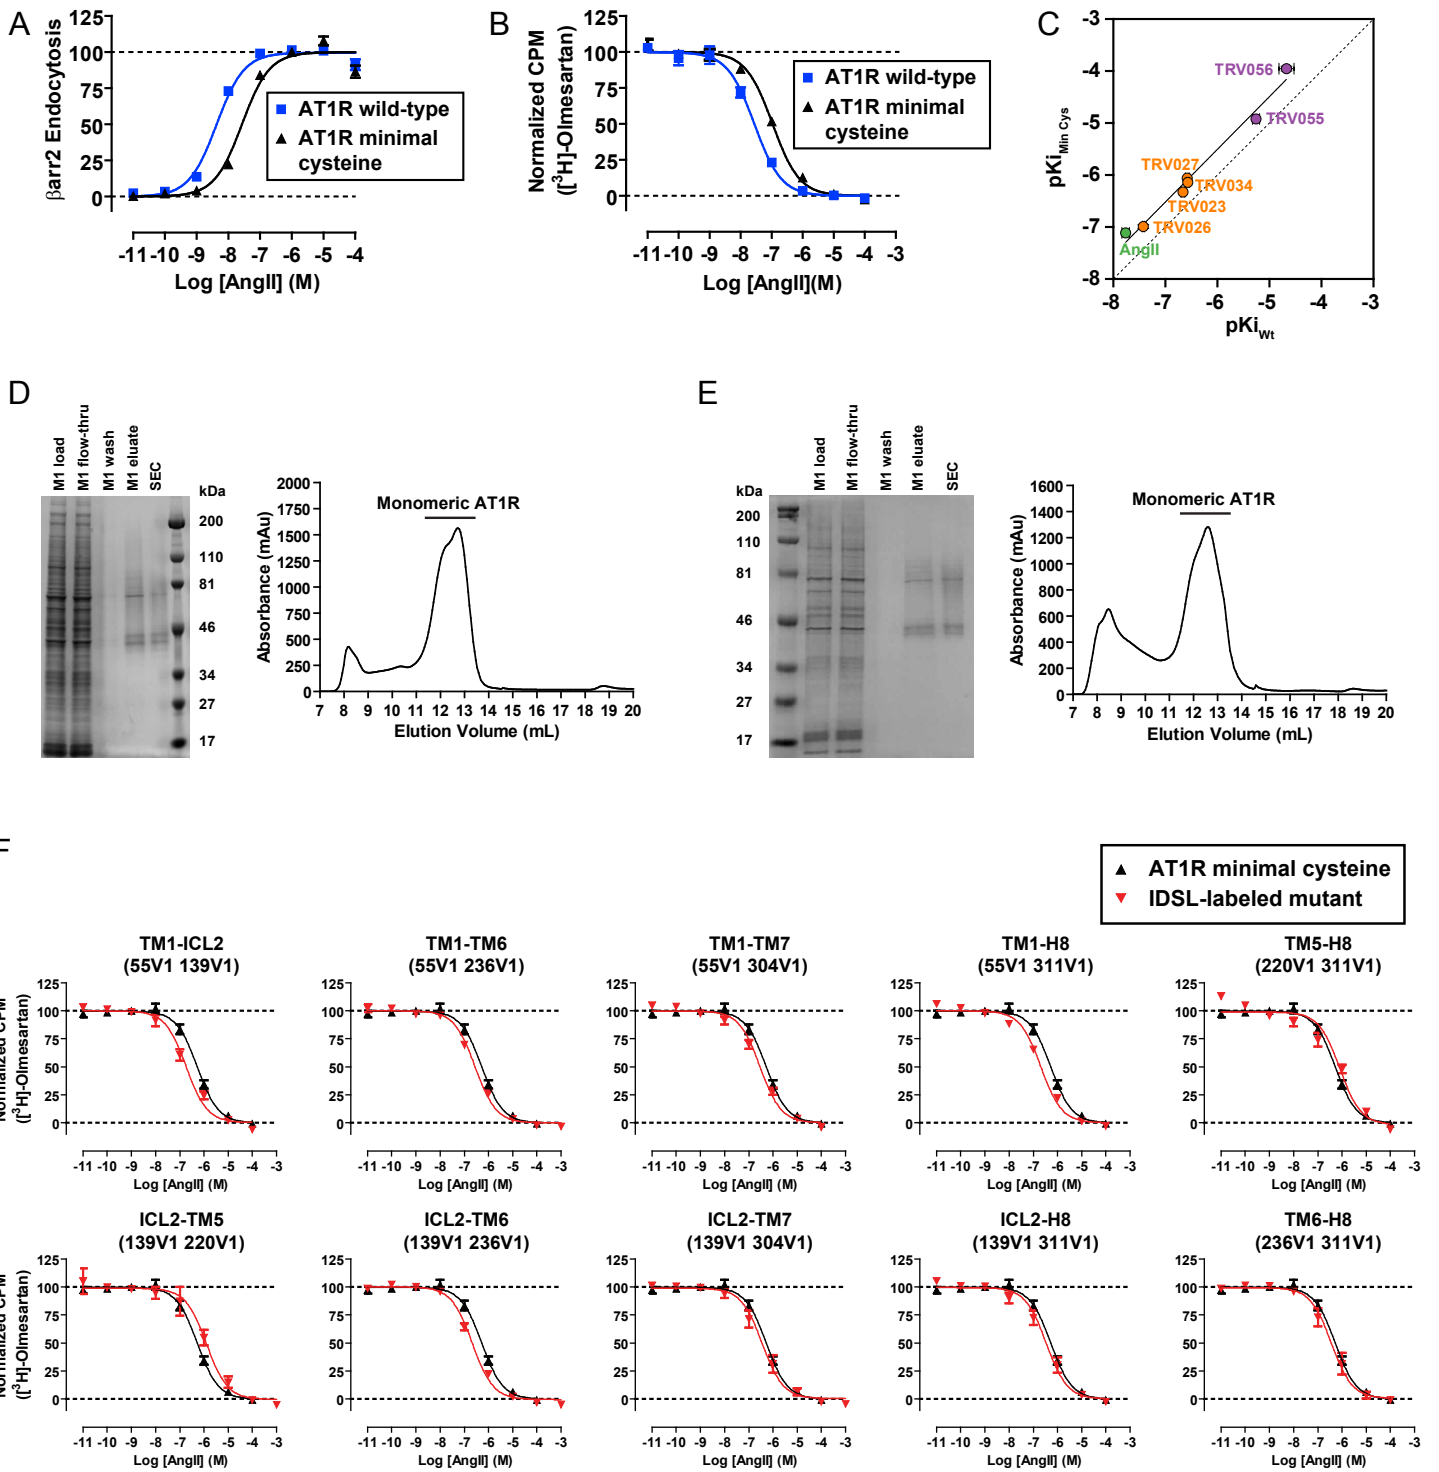

Supplement: NIHMS1516271-supplement-2.pdf [file NIHMS1516271-supplement-2.pdf]

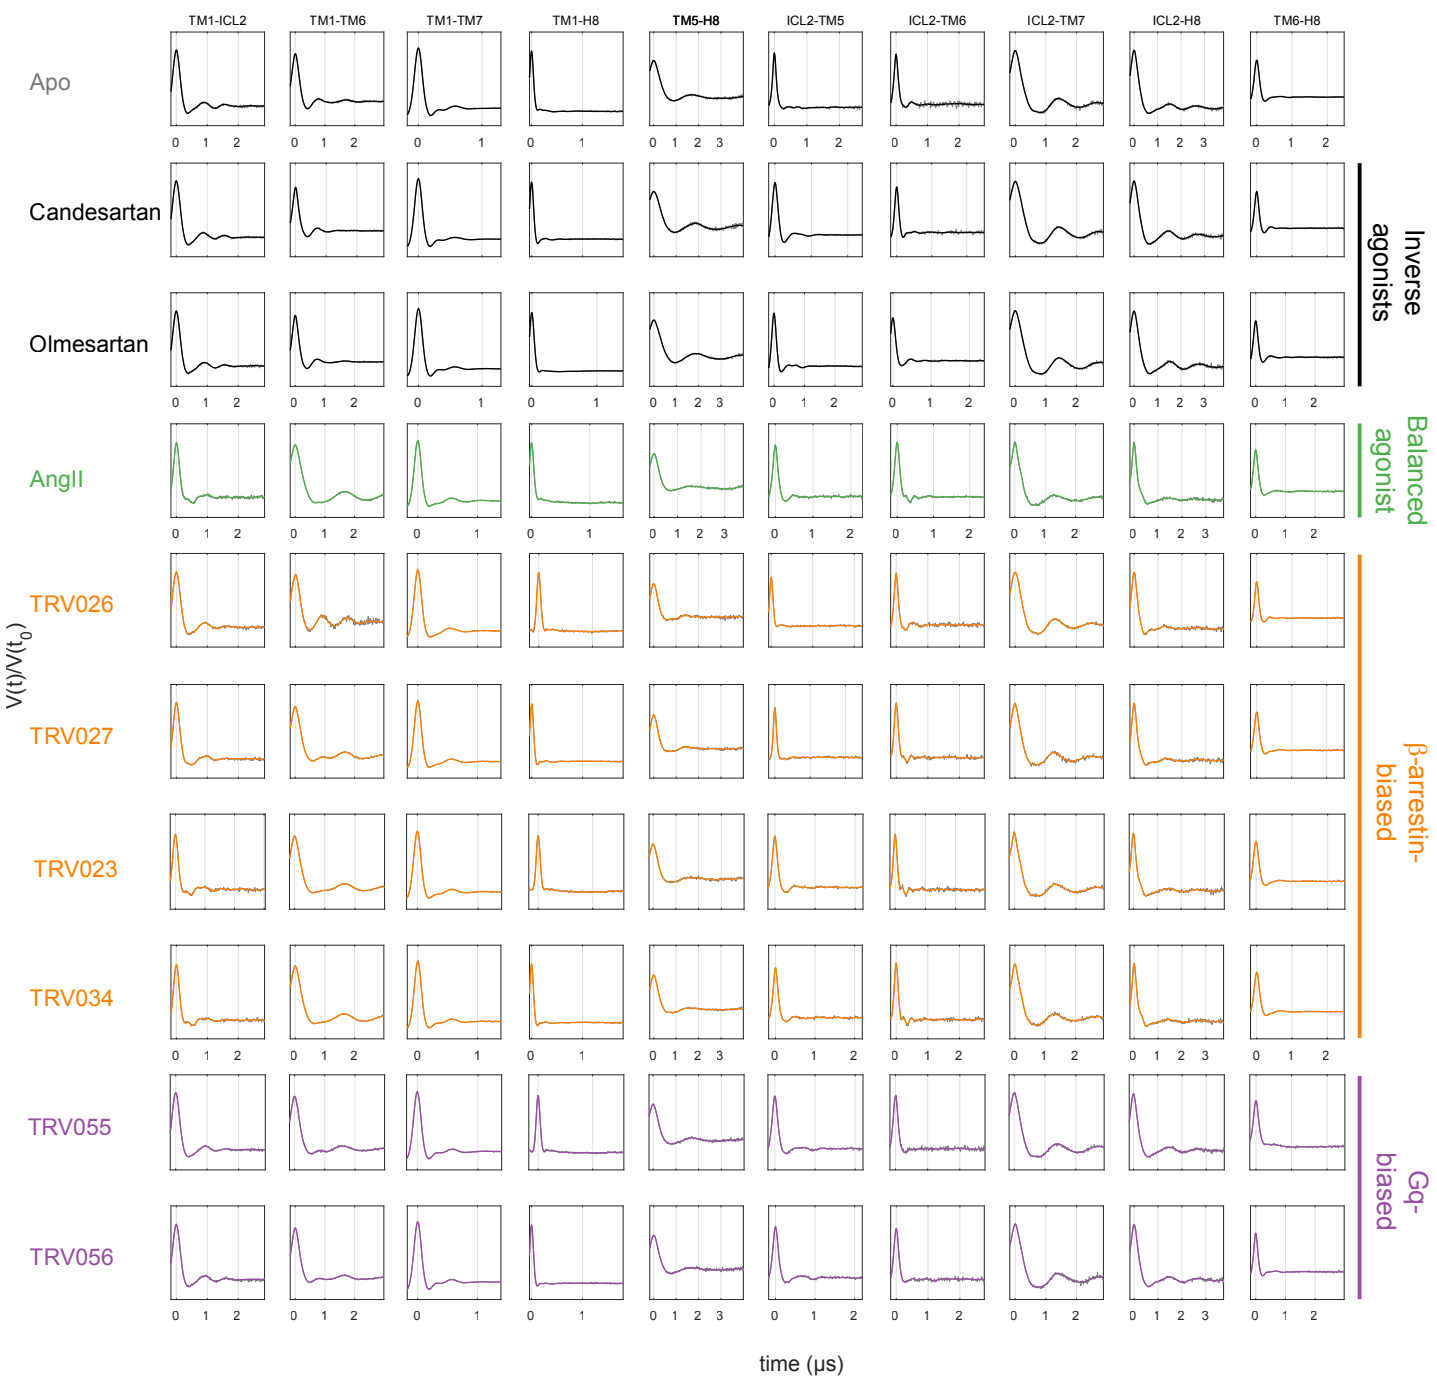

Supplement: NIHMS1516271-supplement-3.pdf [file NIHMS1516271-supplement-3.pdf]
